# Supplementary material
Source: PubMed Central journal article supplement (PMC3121328)
Supplement: NIHMS301116-supplement-Supplementary_Data.pdf [file NIHMS301116-supplement-Supplementary_Data.pdf]

Supplementary Material For:

# Overlap extension PCR cloning: a simple and reliable way to create recombinant plasmids

Anton V. Bryksin and Ichiro Matsumura

Department of Biochemistry, Center for Fundamental and Applied Molecular Evolution, Emory University, Atlanta, Georgia, USA

BioTechniques 48:463-465 (June 2010) doi 10.2144/000113418

Keywords: overlap extension PCR cloning; recombinant vector; Phusion; restriction enzyme ligation independent

## Standard molecular techniques

All primers used in the study (Supplementary Table S3) were purchased from IDT (Coralville, IA, USA). DNA for PCR amplification of *luxA*, *luxB*, *luxC*, *luxD*, and *luxE* genes was from *Photobacterium luminescens* (ATCC number 29999; Manassas, VA, USA). *Escherichia coli* K12 DNA for PCR amplification of the *lacZ* and *gusA* genes was purified by standard methods (1). pCA24N (2) vector was used as a DNA template to PCR-amplify the *gfp* gene. DNA fragments and PCR mixtures were analyzed on 0.8% Seakem LE agarose gels (Lonza Rockland, Rockland, ME, USA) using 1 kb DNA ladder (New England BioLabs, Ipswich, MA, USA) as molecular size markers. Restriction enzymes and DNA modification enzymes were from New England BioLabs, and reactions were carried out under the recommended conditions. All other chemicals used in the study were of molecular biology grade. When necessary, DNA fragments were purified using agarose gels followed by purification using QIAquick-gel extraction kits from QIAGEN (Valencia, CA, USA). DNA sequencing was performed by Macrogen (Rockville, MD, USA); BioBricks were assembled as directed in the BioBrick Assembly Manual (New England BioLabs).

## Bacterial strains, plasmids, growth conditions and transformation procedures.

All strains and plasmids used in the study are listed in Supplementary Table S2. Chemically competent *E. coli* cells were prepared according to Inoue et al. (3). For each transformation, 1  $\mu$ L overlap extension PCR reaction (Figure 1C) was used to transform 20  $\mu$ L competent cells. The transformants (250  $\mu$ L) were spread on Luria Bertani medium (LB) agar plates containing appro-

priate antibiotic and 100  $\mu$ M isopropyl  $\beta$ -D-1-thiogalactopyranoside (IPTG; if necessary). The constructs produced in this study conform to the BioBricks standard [Knight, T. Draft Standard for Biobrick Biological Parts (OpenWetWare, MIT, Cambridge, MA, USA, 2007). <http://hdl.handle.net/1721.1/45138> ], but we emphasize that the cloning technique described here can be applied to any insert and vector without regard to restriction sites.

A custom BioBrick accepting vector (pIMBB) was created by cloning a synthetic multiple cloning site (*EcoRI-NotI-XbaI-SphI*-ribosome binding site-*NcoI-EcoRV-HindIII-SpeI-NotI-PstI*) into the *DraIII* and *AflIII* sites of pSL1180 (Amersham Pharmacia Biotech, Piscataway, NJ, USA). This plasmid retains its *ColE1* origin and  $\beta$ -lactamase gene and has restriction sites *EcoRI*, *NotI*, *XbaI*, *SpeI*, or *PstI* present only in the multiple cloning site, which is crucial for BioBricks assembly. Desired BioBricks cloned into this plasmid can subsequently be combined with others (see BioBrick Assembly Manual at <http://ginkgobioworks.com/support> for details. A series of reporter BioBricks (*gfp*, *gusA*, *lacZ*, *luxA*, *luxB*, *luxC*, *luxD*, and *luxE*) was produced by PCR amplification with appropriate primers (Supplementary Table S3) and subsequent cloning into the pIMBB vector. Each BioBrick was then combined with the ribosomal binding site (rbs) BioBrick (oligos 213–214; Supplementary Table S3). After that, rbs-fused *luxA*, *luxB*, *luxC*, *luxD* and *luxE* BioBricks were combined to create a *luxAluxBluxCluxDluxE* BioBrick (synthetic LUX operon). Reporter BioBricks were then separately combined with a BioBrick containing the T5-promoter and two *lac* operators (oligos 221–222; Supplementary

Table S3) to enable regulated expression in the presence of the *lacI* repressor.

## Overlap extension PCR cloning

Phusion DNA polymerase (New England BioLabs) (or Expand Long Template enzyme mix, Roche, Basel, Switzerland) and chimeric primers (5' end, vector-specific sequences; 3' end, insert-specific sequences) were used to PCR-amplify the inserts (Figure 1A). In particular, primers 278 and 279 were used to PCR-amplify *gfp*, *gusA*, *lacZ*, and LUX operon from pIMBB for cloning into pQBAV3Cam vector. Primers 278 and 280 were used to PCR-amplify *gfp* from pIMBB-*gfp* for cloning into pQBAV2ACam. Each PCR was subjected to a temperature regimen similar to the following: initial denaturation at 100°C for 2 min, denaturation at 94°C for 30 s, annealing at 60°C for 30 s, extension at 68°C for 90 s/kb for 30–32 cycles, with a final extension of 68°C for 10 min. All PCR-amplified inserts were gel-purified prior to use as megaprimers in (see Figure 1B).

Primer design for overlap extension PCR follows 3 easy steps presented in Supplementary Figure S1. First, design appropriate primers A and B to PCR-amplify the insert using web-based tools [e.g., Primer3 (<http://primer3.sourceforge.net>), Primer Design ([www.bioinformatics.org/jambw/5/2/index.html](http://www.bioinformatics.org/jambw/5/2/index.html)), or Primer-Blast ([www.ncbi.nlm.nih.gov/tools/primer-blast](http://www.ncbi.nlm.nih.gov/tools/primer-blast))]. Second, select the desirable insert points on the plasmid; they can be in close proximity to each other or, preferably, 50 to several hundred base pairs apart. Now select 30–40 bp upstream of the left point of insert on the top strand of the plasmid. Copy this sequence and estimate its  $T_m$  using an online tool (Oligo Calculator, [www.idtdna.com/analyzer/Applications/OligoAnalyzer/Default.aspx](http://www.idtdna.com/analyzer/Applications/OligoAnalyzer/Default.aspx)). If  $T_m$  parameter (60–65°C; see main text) is satisfied, save the sequence as primer C. Select 30–40 bp downstream of the right point of insert on the bottom strand of the plasmid. Copy the reverse sequence and analyze its  $T_m$  using an online tool (Oligo Calculator); If the  $T_m$  parameter is satisfied, save the sequence as primer D. Attach the sequence of primer C to the 5' end of the primer A. Attach the sequence of primer D to the 5' end of the primer B.

Overlap extension PCR (Figure 1B) requires a combination of high GC content in the vector-specific part of the chimeric primers (5' end) and relatively low (as compared with the primers designed  $T_m$ ) annealing temperature in the thermocycler.

1

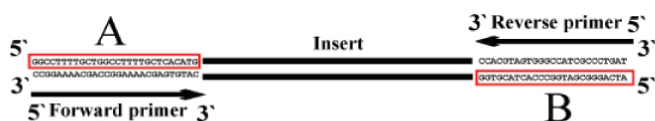

Step 1 results:

| Primer         | Sequence 5' - 3'           | T <sub>m</sub> |
|----------------|----------------------------|----------------|
| Forward primer | GGCCTTTGCTGGCCTTTGCTCACATG | 64.4 °C        |
| Reverse primer | ATCAGGGCGATGGCCCACTACGTGG  | 66.6 °C        |

2

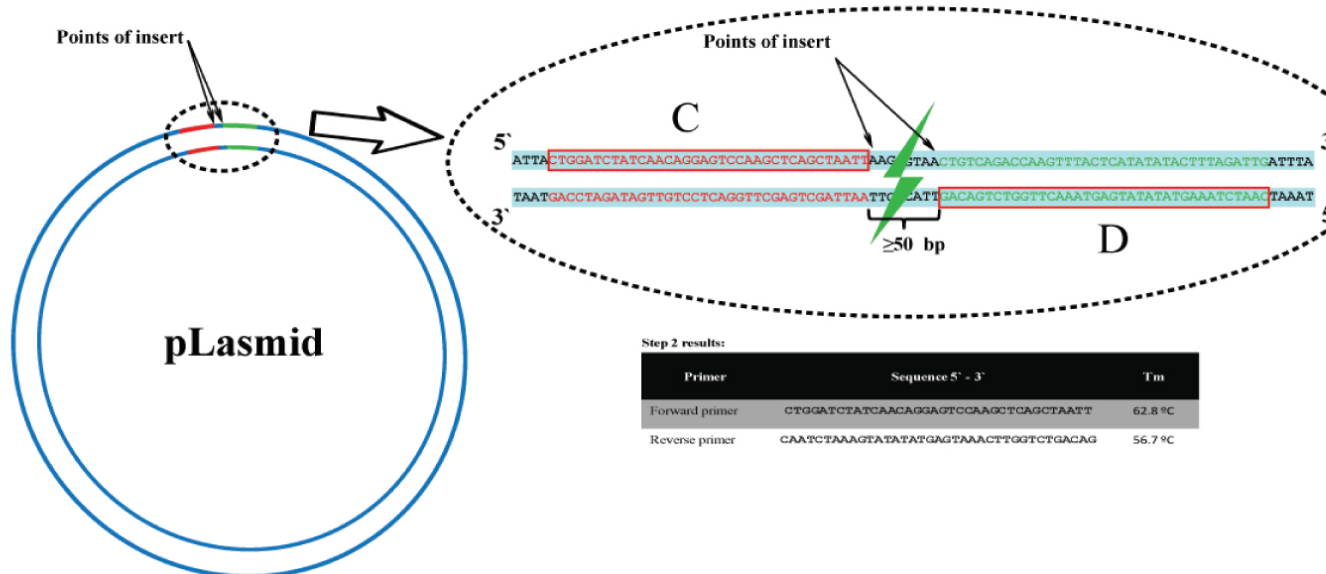

Step 2 results:

| Primer         | Sequence 5' - 3'                      | T <sub>m</sub> |
|----------------|---------------------------------------|----------------|
| Forward primer | CTGGATCTATCAACAGGAGTCCAAGCTCAGCTAATT  | 62.8 °C        |
| Reverse primer | CAATCTAAAGTATATATGAGTAAACTTGGTCTGACAG | 56.7 °C        |

3

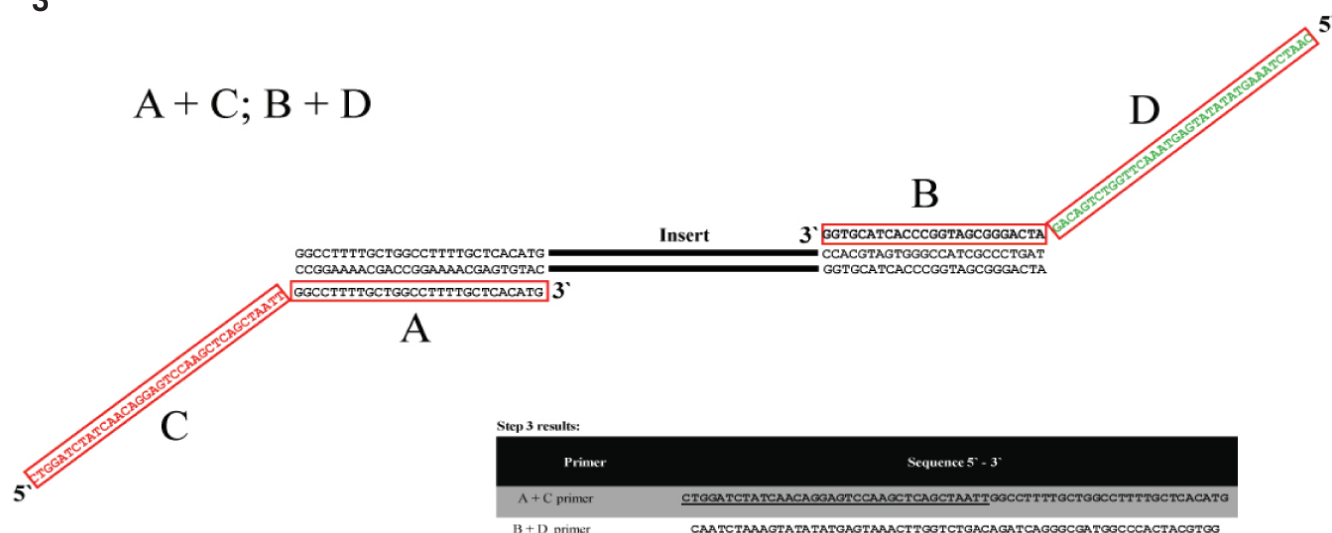

Step 3 results:

| Primer       | Sequence 5' - 3'                                               |
|--------------|----------------------------------------------------------------|
| A + C primer | CTGGATCTATCAACAGGAGTCCAAGCTCAGCTAATTGGCCTTTGCTGGCCTTTGCTCACATG |
| B + D primer | CAATCTAAAGTATATATGAGTAAACTTGGTCTGACAGATCAGGGCGATGGCCCACTACGTGG |

**Supplementary Figure S1. Making the primers for overlap extension PCR cloning.** (1) Design appropriate primers A and B to PCR-amplify the insert using web-based tools (e.g., Primer3, Primer Design, or Primer-Blast). (2) Select the desirable insert points on the plasmid; they could be in close proximity to each other or, preferably, 50 to several hundred bp apart. Then select 30–40 bp upstream of the left point of insert on the direct strand of the plasmid; copy this sequence. Analyze T<sub>m</sub> using online tool (Oligo Calculator); if T<sub>m</sub> parameter is satisfied, save the sequence of the primer C. Select 30–40 bp downstream of the right point of insert on the direct strand of the plasmid; copy the sequence. Analyze T<sub>m</sub> using online tool (Oligo Calculator); if T<sub>m</sub> parameter is satisfied, make reverse complement of the sequence using online tool (Reverse complement) and save the sequence of the primer D. (3) Attach the sequence of the primer C to the 5' end of the primer A; attach the sequence of the primer D to the 5' end of the primer B.

**Supplementary Table S1. Comparison of the performance of different PCR systems in overlap extension PCR cloning**

| DNA polymerase                          | Processivity                                  | Number of colonies expressing GFP/plate | Number of white colonies/plate |
|-----------------------------------------|-----------------------------------------------|-----------------------------------------|--------------------------------|
| <i>KOD</i> DNA polymerase               | >300 bases (5)                                | 14                                      | 0                              |
| Phusion DNA polymerase                  | >360 bases (6)                                | 417                                     | 8                              |
| Expand Long Template DNA polymerase mix | 50–60 bases for <i>Taq</i> DNA polymerase (5) | 12                                      | 2                              |
| Deep Vent DNA polymerase                | ?                                             | 0                                       | 0                              |
| <i>Pfu</i> DNA polymerase               | 15–20 bases (5)                               | 9                                       | 1                              |
| <i>Taq</i> DNA polymerase               | 50–60 bases (6)                               | Not tested                              | Not tested                     |

Phusion DNA polymerase was used to PCR-amplify green fluorescent protein (*gfp*) gene from the pIMBB-*gfp* plasmid. The PCR products were gel-purified and used in the overlap extension PCR reaction with pQE30 vector. Three nanograms of pQE30 vector was mixed with 500 ng insert in the total reaction volume of 10  $\mu$ L, and subjected to 25 cycles of PCR with different PCR systems: *KOD*, Phusion, Expand Long Template mix, DeepVent and *Pfu*. The original plasmid was destroyed in restriction digests with *DpnI*, and the overlap extension PCR products were used to transform competent *E. coli* cells.

**Supplementary Table S2. Bacterial strains and plasmids used in the study**

| Name                              | Description                                                                  | Reference or source                  |
|-----------------------------------|------------------------------------------------------------------------------|--------------------------------------|
| <b>Strains</b>                    |                                                                              |                                      |
| <i>Escherichia coli</i>           |                                                                              |                                      |
| AG1                               | F- recA1 endA1 gyrA96 thi-1 hsdR17(rk- mk+) supE44 relA1                     | "NBRP (NIG, Japan): <i>E. coli</i> " |
| <i>Photobacterium luminescens</i> |                                                                              | ATCC number 29999                    |
| <b>Plasmids</b>                   |                                                                              |                                      |
| pQE30                             | Expression Vector; T5lacO; ColE1 replicon; Amp <sup>r</sup> Cam <sup>r</sup> | Qiagen                               |
| pCA24N                            | Expression Vector; T5lacO; ColE1 replicon; Cam <sup>r</sup>                  | (2)                                  |
| IMBB-pSL1180- <i>gfp</i>          | Amp <sup>r</sup>                                                             | This study                           |
| pIMBB                             | BioBrick accepting vector; ColE1 replicon; Amp <sup>r</sup>                  | This study                           |
| pIMBB- <i>gfp</i>                 | Amp <sup>r</sup>                                                             | This study                           |
| pIMBB- <i>gusA</i>                | Amp <sup>r</sup>                                                             | This study                           |
| pIMBB- <i>lacZ</i>                | Amp <sup>r</sup>                                                             | This study                           |
| pIMBB-luxABCDE                    | Amp <sup>r</sup>                                                             | This study                           |
| pQBAV3Cam- <i>gfp</i>             | Cam <sup>r</sup>                                                             | This study                           |
| pQBAV3Cam- <i>gusA</i>            | Cam <sup>r</sup>                                                             | This study                           |
| pQBAV3Cam- <i>lacZ</i>            | Cam <sup>r</sup>                                                             | This study                           |
| pQBAV3Cam-luxABCDE                | Cam <sup>r</sup>                                                             | This study                           |
| pQBAV2ACam- <i>gfp</i>            | Amp <sup>r</sup> Cam <sup>r</sup>                                            | This study                           |

We recommend a molar excess of insert over plasmid template. The concentration of megaprimers (PCR product of Figure 1A) is much lower than the concentration of synthetic primers in regular PCRs; they could be shorter than expected and thus have lower melting temperature. Acceptor plasmid template (3–30 ng) was mixed with 250 $\times$  molar excess of insert DNA (from Figure 1A) in a 10- $\mu$ L total volume containing Phusion DNA polymerase reaction mixture containing dNTPs, buffer, and enzyme. The insert and vector underwent denaturation (98°C for 30 s), annealing (60°C for 30 s), and polymerase-catalyzed extension (98°C for 1.5 min per kb according to the length of the longest piece) for 5–30 cycles. We normally added

an extra 10-min extension step in the end of the program. For average-sized vectors and inserts, the total reaction time was <2 h. The same PCR parameters and volumes were used for overlap PCR cloning reactions with other polymerases and polymerase mixtures [*KOD* (Merck, San Diego, CA, USA); Expand Long Template mix (Roche); Deep Vent (New England BioLabs); and *Pfu* (Stratagene, La Jolla, CA, USA)], except that the buffer system was substituted with one recommended by each respective manufacturer.

The *DpnI* endonuclease works well in Phusion HF buffer. We typically add 10 units of the enzyme directly to the PCR tube right after the final extension is done and incubate the reaction for an hour at

37°C (see Figure 1C). Restriction endonuclease *DpnI* targets methylated DNA sequences and can thereby cleave the DNA template isolated from most *E. coli* strains, but not the PCR product (4).

#### Additional results

Recombinant plasmids often have repeated elements such as promoters, ribosomal binding sites, terminators, and scar sites. We wondered whether overlap extension PCR cloning was sensitive to the presence of internal sequences in the target plasmid identical to those in the insert. Chimeric primers were used to PCR-amplify a *gfp* gene fused to the T5 promoter/lac operator. A similar T5 promoter/lac operator sequence was present in the

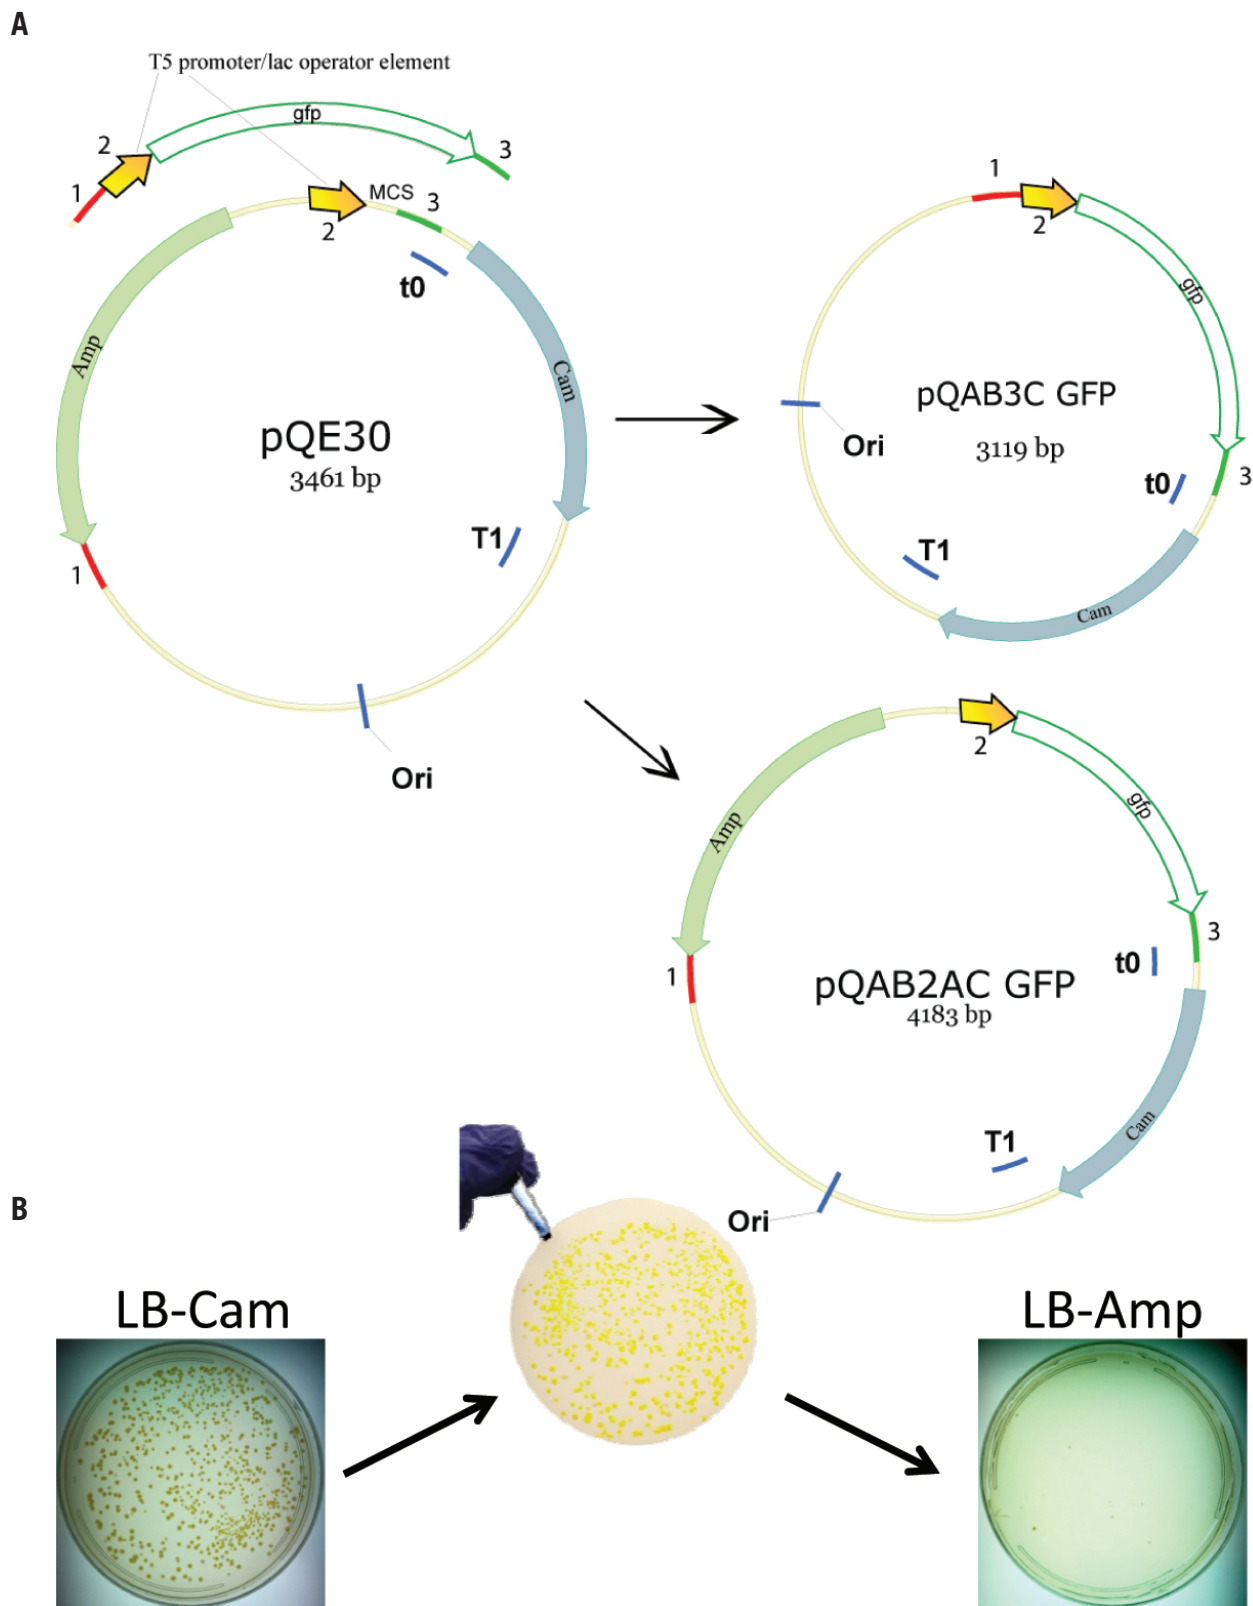

**Supplementary Figure S2. Overlap extension PCR cloning of the fragment with internal sequence identity to the plasmid.** (A) Outline of the possible outcomes of cloning. (B) Analyses of the overlap extension PCR cloning using antibiotic selection. *E. coli* cells were plated after the transformation on LB-Cam plate. Colonies formed on the plate were transferred using nitrocellulose on the LB-Amp plate to determine an outcome of the cloning reaction.

Supplementary Table S3. Oligonucleotides and PCR primers used in the study

| Primer                       | Sequence                                                                                              | Additional information                                                     |
|------------------------------|-------------------------------------------------------------------------------------------------------|----------------------------------------------------------------------------|
| 201 SP/luxA/Bba_CluxA        | GGAATTCGGCGCCGCTTCTAGATGAAATTTGGAACTTTTGGCTTACATACCA                                                  | PCR amplification of <i>luxA</i> gene of <i>Photobacterium luminescens</i> |
| 202 ASP/luxA/Bba_CluxA       | CTGCAGCGCCGCTACTAGTATTATTAATAATAATAGCGAACGTTGTTTTCTTTAAGA                                             | PCR amplification of <i>luxA</i> gene of <i>Photobacterium luminescens</i> |
| 203 SP/luxB/Bba_CluxB        | GGAATTCGGCGCCGCTTCTAGATGAAATTTGGATTGTTCTTCCTTAACCTC                                                   | PCR amplification of <i>luxB</i> gene of <i>Photobacterium luminescens</i> |
| 204 ASP/luxB/Bba_CluxB       | CTGCAGCGCCGCTACTAGTATTATTAGGTATATTCCATGTGGTACTTCTTAATA                                                | PCR amplification of <i>luxB</i> gene of <i>Photobacterium luminescens</i> |
| 205 SP/luxC/Bba_CluxC        | GGAATTCGGCGCCGCTTCTAGATGACTAAAAAATTTCAATCATTATTAACGGCC                                                | PCR amplification of <i>luxC</i> gene of <i>Photobacterium luminescens</i> |
| 206 ASP/luxC/Bba_CluxC       | CTGCAGCGCCGCTACTAGTATTATTATGGGACAAATACAAGGAACCTATCTTCTC                                               | PCR amplification of <i>luxC</i> gene of <i>Photobacterium luminescens</i> |
| 207 SP/luxD/Bba_CluxD        | GGAATTCGGCGCCGCTTCTAGATGGAAAATGAATCAAAATATAAAACCATCG                                                  | PCR amplification of <i>luxD</i> gene of <i>Photobacterium luminescens</i> |
| 208 ASP/luxD/Bba_CluxD       | CTGCAGCGCCGCTACTAGTATTATTAAGACAGAGAAATTGCTTGATTTTCAATC                                                | PCR amplification of <i>luxD</i> gene of <i>Photobacterium luminescens</i> |
| 209 SP/luxE/Bba_CluxE        | GGAATTCGGCGCCGCTTCTAGATGACTTCATATGTTGATAACAAGAAATTACAGC                                               | PCR amplification of <i>luxE</i> gene of <i>Photobacterium luminescens</i> |
| 210 ASP/luxE/Bba_CluxE       | CTGCAGCGCCGCTACTAGTATTATTAATCATCAACGCTTCGGTTAAGCTTA                                                   | PCR amplification of <i>luxE</i> gene of <i>Photobacterium luminescens</i> |
| 213 INS_S/RBS/BBa_B0034      | AATTCGGCGCCGCTTCTAGAGAAAGAGGAGAAATA                                                                   | Ribosomal binding site in BioBrick format                                  |
| 214 INS_AS/RBS/BBa_B0034     | CTAGTATTCTCTCTTTCTCTAGAAGCGGCCGCG                                                                     | Ribosomal binding site in BioBrick format                                  |
| 221 INS_S/T52lacO/BBa_R0AB2  | AATTCGGCGCCGCTTCTAGAGAAATCATAAAAAATTTATTGCTTTGTGAGCGGATAA-<br>CAATTATAATAGATTCAAATTGTGAGCGGATAACAATTA | T5promoter/lac operator in BioBrick format                                 |
| 222 INS_AS/T52lacO/BBa_R0AB2 | CTAGTAATTGTTATCCGCTCACAATTGAATCTATTATAATTGTTATCCGCTCA-<br>CAAAGCAAATAAATTTTTATGATTTCTCTAGAAGCGGCCGCG  | (T5promoter/lac operator in BioBrick format                                |
| 252 SP/GFP/1                 | GGAATTCGGCGCCGCTTCTAGATGCGTAAAGGAGAAGAAGCTTTTCACTGGAGTTGTCCC                                          | PCR amplification of <i>gfp</i> gene from pCA24N vector                    |
| 253 ASP/GFP/736              | CGACTGCAGCGCCGCTACTAGTATTATTATTTGTATAGTTCCATGCCATGTG-<br>TAATCC                                       | PCR amplification of <i>gfp</i> gene from pCA24N vector                    |
| 1363ASP/LacZ wt/3075         | CCAGCTGCAGCGCCGCTACTAGTATTATTATTTTGGACACCAGACCAACTGGTAATG                                             | PCR amplification of <i>lacZ</i> gene from K12 <i>E. coli</i> genomic DNA  |
| 1364SP/LacZ wt/1             | GCCGCTTCTAGATGACCATGATTACGGATTCACTGGC                                                                 | PCR amplification of <i>lacZ</i> gene from K12 <i>E. coli</i> genomic DNA  |
| 1365ASP/UidAwt/1812          | CCAGCTGCAGCGCCGCTACTAGTATTATTATTGTTGCCTCCCTGCTGCG                                                     | PCR amplification of <i>gusA</i> gene from K12 <i>E. coli</i> genomic DNA  |
| 1366SP/UidAwt/1              | GCCGCTTCTAGATGTTACGTCCTGTAGAAACCCCAACCCG                                                              | PCR amplification of <i>gusA</i> gene from K12 <i>E. coli</i> genomic DNA  |
| 278 INS/IMBB/pQE30           | <u>CTGGATCTATCAACAGGAGTCCAAGCTCAGCTAAT</u> GGCCTTTTGGCTGGCTTTT-<br>GTCACATG*                          | Overlap extension PCR cloning primer                                       |
| 279 INS/IMBB/pQE30S          | <u>CAATCTAAAGTATATATGAGTAAACTTGGTCTGACAGATCAGGGCGATGCCAC-</u><br>TACGTGG*                             | Overlap extension PCR cloning primer                                       |
| 280 INS/IMBB/pQE30L          | <u>CCTATAAAATAGGCGTATCACGAGGCCCTTTCGCTTCATCAGGGCGATGCCAC-</u><br>TACGTGG*                             | Overlap extension PCR cloning primer                                       |
| 281 INS/pQE30/noXbaI         | CAAATCCGCCCTCCAGAGCTGCCTCGCGC                                                                         | To remove <i>XbaI</i> restriction site from pQE30                          |
| 282 INS/pQE30/noXbaI         | GCGCGAGGCAGCTCTGGAGGGCGGATTTG                                                                         | To remove <i>XbaI</i> restriction site from pQE30                          |

\* 5' addition to the primer complimentary to the vector has been underlined



pQE30 vector; the insert had three regions identical to those on the plasmid (Supplementary Figure S2A). The primers also contained sequences similar to two regions on the plasmid separated by an Amp resistance marker. Successful overlap extension PCR cloning should therefore insert the T5 promoter/gfp cassette and eliminate the Amp marker from the pQE30 vector. Most of the colonies that appeared on the LB-agar plate supplemented with chloramphenicol displayed the “green” phenotype (Supplementary Figure S2B). Replica plating of the plate on LB-Amp resulted in only two surviving colonies (out of >500) that did not have the green phenotype (Supplementary Figure S2B), which probably reflected carryover of the original plasmid.

## References

1. **Sambrook, J. and D.W. Russell.** 2001. *Molecular cloning: a laboratory manual*. Cold Spring Harbor Laboratory Press, Cold Spring Harbor, N.Y.
2. **Kitagawa, M., T. Ara, M. Arifuzzaman, T. Ioka-Nakamichi, E. Inamoto, H. Toyonaga, and H. Mori.** 2005. Complete set of ORF clones of *Escherichia coli* ASKA library (a complete set of *E. coli* K-12 ORF archive): unique resources for biological research. *DNA Res.* 12:291-299.
3. **Inoue, H., H. Nojima, and H. Okayama.** 1990. High efficiency transformation of *Escherichia coli* with plasmids. *Gene* 96:23-28.
4. **Gomez-Eichelmann, M.C. and K.G. Lark.** 1977. Endo R *DpnI* restriction of *Escherichia coli* DNA synthesized in vitro. Evidence that the ends of Okazaki pieces are determined by template deoxynucleotide sequence. *J. Mol. Biol.* 117:621-635.
5. **Benson, L.M., A.P. Null, and D.C. Muddiman.** 2003. Advantages of *Thermococcus kodakaraensis* (KOD) DNA polymerase for PCR-mass spectrometry based analyses. *J. Am. Soc. Mass Spectrom.* 14:601-604.
6. **Wang, Y., D.E. Prosen, L. Mei, J.C. Sullivan, M. Finney, and P.B. Vander Horn.** 2004. A novel strategy to engineer DNA polymerases for enhanced processivity and improved performance in vitro. *Nucleic Acids Res.* 32:1197-1207.
